# Supplementary material for: Derivative processes for modelling metabolic fluxes
Source: PubMed Central journal article supplement (PMC4071196; doi:10.1093/bioinformatics/btu069), 2014-02-26
Supplement: supp_btu069_supp_fig.pdf [file supp_btu069_supp_fig.pdf]

(A) Flux  $v_3$  (WT)

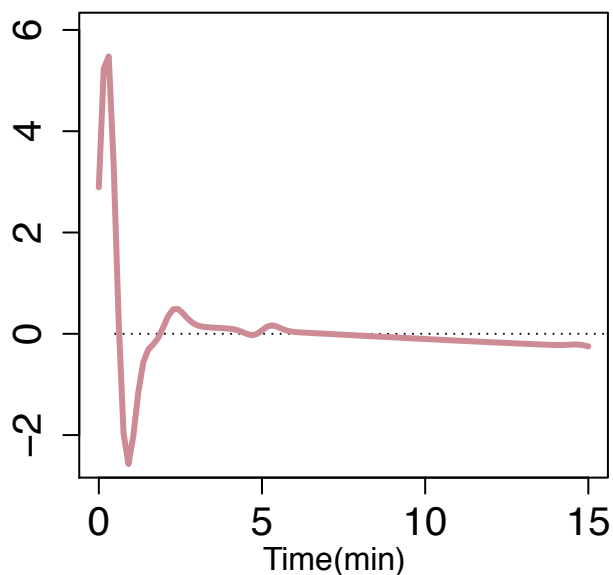

(B) Flux  $v_3$  ( $\Delta$ glnG)

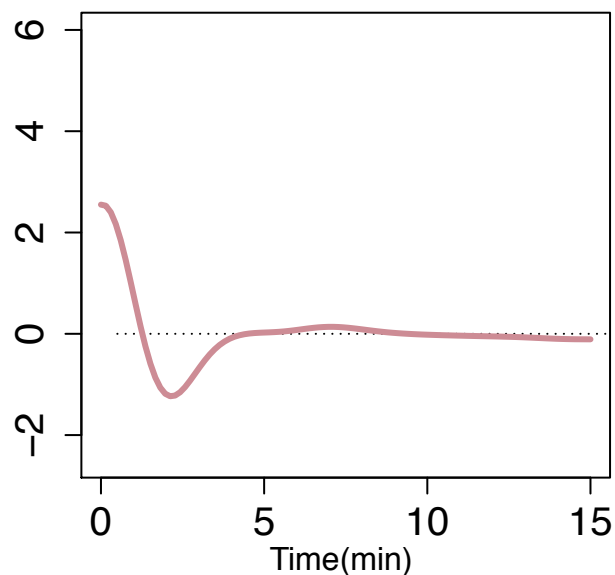

(C) GS (WT)

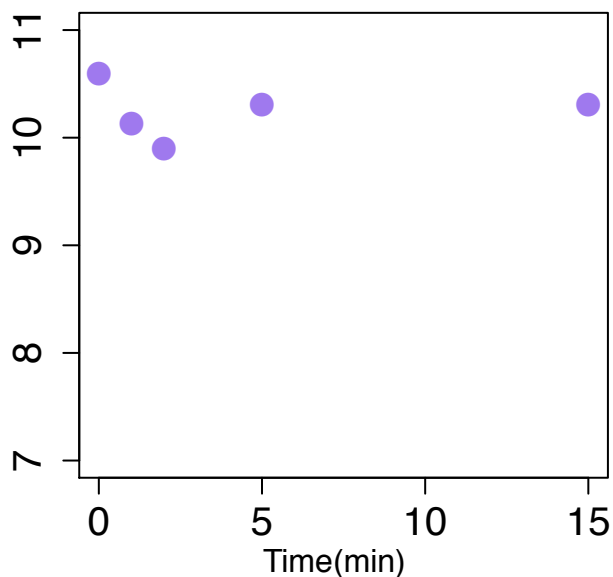

(D) GS ( $\Delta$ glnG)

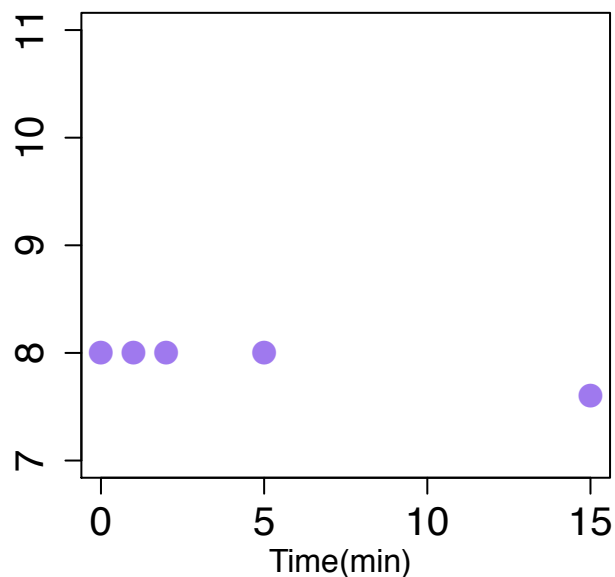

**Fig. S1.** Flux and glutamine synthetase (GS) comparison.

(A) Predicted flux  $v_3$  in wild type *E. Coli*; dotted line illustrates the horizontal 0-axis.

(B) Predicted flux  $v_3$  in  $\Delta$ glnG *E. Coli*; dotted line illustrates the horizontal 0-axis.

(C) Measurements of active form (un-adenylylated form) GS protein in wild type *E. Coli*.

(D) Measurements of active form (un-adenylylated form) GS protein in  $\Delta$ glnG *E. Coli*.
